# Supplementary material for: Socioeconomic Inequalities in Frailty in Hong Kong, China: A 14-Year Longitudinal Cohort Study
Source: MDPI journal article supplement (doi:10.3390/ijerph17041301), 2020-02-18
Supplement: s1 [file s1]

**Table S1a Educational level at baseline and the risk of incident frailty at 14-year follow-up, both sexes (n=694)**

|                                                         | Model 1          | Model 2          | Model 3          | Model 4          | Model 5           | Model 6           | Model 7           | Model 8           |
|---------------------------------------------------------|------------------|------------------|------------------|------------------|-------------------|-------------------|-------------------|-------------------|
| Variables                                               | OR (95% CI)      | OR (95% CI)      | OR (95% CI)      | OR (95% CI)      | OR (95% CI)       | OR (95% CI)       | OR (95% CI)       | OR (95% CI)       |
| <u>Socio-demographics</u>                               |                  |                  |                  |                  |                   |                   |                   |                   |
| Educational level (ref=At least completed primary)      |                  |                  |                  |                  |                   |                   |                   |                   |
| Some primary                                            | 1.22 (0.85-1.76) | 1.22 (0.85-1.76) | 1.17 (0.77-1.77) | 1.08 (0.71-1.64) | 1.06 (0.69-1.61)  | 1.02 (0.66-1.56)  | 1.00 (0.65-1.54)  | 1.01 (0.65-1.56)  |
| No education                                            | 1.34 (0.82-2.18) | 1.32 (0.80-2.16) | 1.27 (0.71-2.27) | 1.25 (0.70-2.25) | 1.48 (0.81-2.71)  | 1.31 (0.71-2.43)  | 1.30 (0.70-2.41)  | 1.34 (0.68-2.62)  |
| Age                                                     | 1.21 (1.15-1.27) | 1.21 (1.15-1.27) | 1.21 (1.15-1.28) | 1.22 (1.15-1.29) | 1.22 (1.15-1.29)  | 1.22 (1.15-1.29)  | 1.22 (1.15-1.29)  | 1.22 (1.15-1.29)  |
| Female (ref=Male)                                       | 1.77 (1.26-2.49) | 1.74 (1.23-2.48) | 1.77 (1.13-2.78) | 2.04 (1.29-3.24) | 2.01 (1.25-3.21)  | 2.15 (1.29-3.57)  | 2.16 (1.30-3.60)  | 2.17 (1.30-3.62)  |
| Non-married (single, divorced, separated) (ref=Married) |                  | 1.07 (0.71-1.63) | 0.93 (0.57-1.53) | 0.95 (0.58-1.56) | 0.88 (0.53-1.46)  | 0.89 (0.54-1.48)  | 0.90 (0.54-1.50)  | 0.90 (0.54-1.50)  |
| Maximum life-time income (ref=Quartile 4 ≥HKD\$14,000)  |                  |                  |                  |                  |                   |                   |                   |                   |
| Quartile 3 HKD\$8,000-13,999                            |                  |                  | 0.89 (0.55-1.45) | 0.82 (0.50-1.34) | 0.82 (0.50-1.35)  | 0.83 (0.50-1.37)  | 0.82 (0.50-1.36)  | 0.82 (0.50-1.36)  |
| Quartile 2 HKD\$2,500-7900                              |                  |                  | 1.29 (0.75-2.24) | 1.17 (0.67-2.04) | 1.25 (0.71-2.19)  | 1.30 (0.74-2.30)  | 1.32 (0.75-2.33)  | 1.33 (0.75-2.35)  |
| Quartile 1 HKD\$0-2,499                                 |                  |                  | 1.22 (0.67-2.23) | 1.12 (0.61-2.05) | 1.15 (0.62-2.12)  | 1.19 (0.64-2.20)  | 1.18 (0.64-2.19)  | 1.19 (0.64-2.21)  |
| <u>Socioeconomic status</u>                             |                  |                  |                  |                  |                   |                   |                   |                   |
| Subjective social status (ref=High)                     |                  |                  |                  |                  |                   |                   |                   |                   |
| Middle                                                  |                  |                  |                  | 1.83 (1.24-2.68) | 1.97 (1.33-2.92)  | 2.03 (1.36-3.02)  | 2.03 (1.36-3.01)  | 2.03 (1.36-3.02)  |
| Low                                                     |                  |                  |                  | 2.43 (1.26-4.68) | 2.29 (1.17-4.47)  | 2.30 (1.17-4.49)  | 2.35 (1.20-4.61)  | 2.34 (1.19-4.60)  |
| <u>Medical history</u>                                  |                  |                  |                  |                  |                   |                   |                   |                   |
| Hypertension (ref=No hypertension)                      |                  |                  |                  |                  | 1.93 (1.31-2.84)  | 1.83 (1.23-2.72)  | 1.83 (1.23-2.73)  | 1.84 (1.23-2.74)  |
| Diabetes (ref=No diabetes)                              |                  |                  |                  |                  | 1.86 (1.10-3.14)  | 1.78 (1.05-3.03)  | 1.78 (1.05-3.03)  | 1.78 (1.05-3.03)  |
| Stroke (ref=No stroke)                                  |                  |                  |                  |                  | 3.57 (1.27-10.05) | 3.79 (1.32-10.84) | 3.74 (1.31-10.68) | 3.75 (1.31-10.69) |
| <u>Lifestyle</u>                                        |                  |                  |                  |                  |                   |                   |                   |                   |
| Current smoker (ref=Non-current)                        |                  |                  |                  |                  |                   | 1.19 (0.47-3.03)  | 1.18 (0.47-3.01)  | 1.18 (0.46-3.01)  |

---

|                                           |                  |                  |                  |
|-------------------------------------------|------------------|------------------|------------------|
| smoker)                                   |                  |                  |                  |
| Current drinker (ref=Non-current drinker) | 1.11 (0.74-1.64) | 1.10 (0.74-1.64) | 1.10 (0.74-1.64) |
| Physical activity, PASE score             | 1.00 (1.00-1.00) | 1.00 (1.00-1.00) | 1.00 (1.00-1.00) |
| Diet quality, DQI                         | 1.00 (0.98-1.01) | 0.99 (0.98-1.01) | 0.99 (0.98-1.01) |
| BMI, kg/m <sup>2</sup>                    | 1.07 (1.01-1.15) | 1.07 (1.00-1.15) | 1.07 (1.00-1.15) |
| <u>Mental health</u>                      |                  |                  |                  |
| SF-12 MCS score                           |                  | 1.01 (0.98-1.05) | 1.01 (0.98-1.05) |
| <u>Cognitive function</u>                 |                  |                  |                  |
| MMSE score                                |                  |                  | 1.01 (0.94-1.08) |

---

Model 1 was adjusted for age and sex at baseline

Model 2 was adjusted for variables in model 1 plus marital status at baseline

Model 3 was adjusted for variables in model 2 plus maximum life-time income at baseline

Model 4 was adjusted for variables in model 3 plus subjective social status (community status ladder) at baseline

Model 5 was adjusted for variables in model 4 plus medical history (hypertension, diabetes, and stroke) at baseline

Model 6 was adjusted for variables in model 5 plus lifestyle (smoking status, alcohol consumption, physical activity (PASE score), diet quality (DQI), BMI) at baseline

Model 7 was adjusted for variables in model 6 plus mental health (SF-12 MCS) at baseline

Model 8 was adjusted for variables in model 7 plus cognitive function (MMSE) at baseline

Ref, Reference; PASE, Physical Activity Scale of the Elderly; DQI, Diet Quality Index; BMI, Body Mass Index; SF-12 MCS, Short Form-12 Mental Component Summary; MMSE, Mini-Mental Status Examination

**Table S1b Educational level at baseline and the risk of incident frailty at 14-year follow-up, men (n=346)**

|                                                         | Model 1          | Model 2          | Model 3          | Model 4          | Model 5           | Model 6           | Model 7           | Model 8           |
|---------------------------------------------------------|------------------|------------------|------------------|------------------|-------------------|-------------------|-------------------|-------------------|
| Variables                                               | OR (95% CI)      | OR (95% CI)      | OR (95% CI)      | OR (95% CI)      | OR (95% CI)       | OR (95% CI)       | OR (95% CI)       | OR (95% CI)       |
| <i>Socio-demographics</i>                               |                  |                  |                  |                  |                   |                   |                   |                   |
| Educational level (ref=At least completed primary)      |                  |                  |                  |                  |                   |                   |                   |                   |
| Some primary                                            | 1.39 (0.82-2.36) | 1.36 (0.80-2.32) | 1.16 (0.66-2.03) | 1.01 (0.57-1.79) | 0.95 (0.53-1.71)  | 0.93 (0.51-1.68)  | 0.89 (0.49-1.62)  | 0.81 (0.44-1.51)  |
| No education                                            | 1.77 (0.51-6.23) | 1.85 (0.52-6.55) | 2.25 (0.62-8.25) | 2.11 (0.54-8.16) | 3.05 (0.75-12.43) | 2.80 (0.66-11.93) | 2.89 (0.68-12.36) | 2.30 (0.52-10.09) |
| Age                                                     | 1.21 (1.13-1.30) | 1.22 (1.13-1.31) | 1.17 (1.09-1.26) | 1.18 (1.09-1.28) | 1.19 (1.10-1.29)  | 1.20 (1.11-1.30)  | 1.20 (1.11-1.30)  | 1.20 (1.11-1.30)  |
| Non-married (single, divorced, separated) (ref=Married) |                  | 0.71 (0.27-1.88) | 0.71 (0.25-2.01) | 0.70 (0.24-2.01) | 0.58 (0.20-1.70)  | 0.60 (0.20-1.77)  | 0.61 (0.21-1.81)  | 0.62 (0.21-1.86)  |
| Maximum life-time income (ref=Quartile 4 ≥HKD\$14,000)  |                  |                  |                  |                  |                   |                   |                   |                   |
| Quartile 3 HKD\$8,000-13,999                            |                  |                  | 1.31 (0.75-2.30) | 1.21 (0.69-2.14) | 1.21 (0.68-2.16)  | 1.23 (0.69-2.20)  | 1.22 (0.68-2.19)  | 1.24 (0.69-2.22)  |
| Quartile 2 HKD\$2,500-7900                              |                  |                  | 1.41 (0.69-2.87) | 1.37 (0.66-2.84) | 1.39 (0.66-2.92)  | 1.45 (0.68-3.08)  | 1.47 (0.69-3.11)  | 1.37 (0.64-2.93)  |
| Quartile 1 HKD\$0-2,499                                 |                  |                  | 1.72 (0.62-4.80) | 1.43 (0.51-4.05) | 1.50 (0.52-4.30)  | 1.43 (0.50-4.15)  | 1.48 (0.51-4.29)  | 1.35 (0.46-3.97)  |
| <i>Socioeconomic status</i>                             |                  |                  |                  |                  |                   |                   |                   |                   |
| Subjective social status (ref=High)                     |                  |                  |                  |                  |                   |                   |                   |                   |
| Middle                                                  |                  |                  |                  | 2.06 (1.22-3.49) | 2.21 (1.29-3.78)  | 2.23 (1.30-3.83)  | 2.22 (1.29-3.82)  | 2.21 (1.28-3.81)  |
| Low                                                     |                  |                  |                  | 3.75 (1.66-8.47) | 3.44 (1.48-7.97)  | 3.42 (1.47-7.97)  | 3.45 (1.48-8.07)  | 3.60 (1.54-8.41)  |
| <i>Medical history</i>                                  |                  |                  |                  |                  |                   |                   |                   |                   |
| Hypertension (ref=No hypertension)                      |                  |                  |                  |                  | 1.93 (1.12-3.33)  | 1.80 (1.02-3.18)  | 1.82 (1.03-3.21)  | 1.74 (0.98-3.09)  |
| Diabetes (ref=No diabetes)                              |                  |                  |                  |                  | 2.02 (0.97-4.24)  | 1.95 (0.93-4.12)  | 2.01 (0.95-4.27)  | 1.99 (0.93-4.23)  |
| Stroke (ref=No stroke)                                  |                  |                  |                  |                  | 3.07 (0.86-10.99) | 3.12 (0.86-11.40) | 3.15 (0.87-11.48) | 3.28 (0.90-12.00) |
| <i>Lifestyle</i>                                        |                  |                  |                  |                  |                   |                   |                   |                   |
| Current smoker (ref=Non-current)                        |                  |                  |                  |                  |                   | 1.18 (0.42-3.30)  | 1.15 (0.41-3.24)  | 1.13 (0.40-3.19)  |

---

|                                           |                  |                  |                  |
|-------------------------------------------|------------------|------------------|------------------|
| smoker)                                   |                  |                  |                  |
| Current drinker (ref=Non-current drinker) | 1.00 (0.56-1.79) | 1.02 (0.57-1.83) | 1.03 (0.57-1.86) |
| Physical activity, PASE score             | 1.00 (1.00-1.01) | 1.00 (1.00-1.01) | 1.00 (1.00-1.01) |
| Diet quality, DQI                         | 1.00 (0.97-1.03) | 1.00 (0.97-1.02) | 1.00 (0.97-1.02) |
| BMI, kg/m <sup>2</sup>                    | 1.07 (0.97-1.18) | 1.07 (0.97-1.18) | 1.07 (0.97-1.18) |
| <u>Mental health</u>                      |                  |                  |                  |
| SF-12 MCS score                           |                  | 1.02 (0.97-1.07) | 1.02 (0.98-1.07) |
| <u>Cognitive function</u>                 |                  |                  |                  |
| MMSE score                                |                  |                  | 0.92 (0.81-1.05) |

---

Model 1 was adjusted for age at baseline

Model 2 was adjusted for variable in model 1 plus marital status at baseline

Model 3 was adjusted for variables in model 2 plus maximum life-time income at baseline

Model 4 was adjusted for variables in model 3 plus subjective social status (community status ladder) at baseline

Model 5 was adjusted for variables in model 4 plus medical history (hypertension, diabetes, and stroke) at baseline

Model 6 was adjusted for variables in model 5 plus lifestyle (smoking status, alcohol consumption, physical activity (PASE score), diet quality (DQI), BMI) at baseline

Model 7 was adjusted for variables in model 6 plus mental health (SF-12 MCS) at baseline

Model 8 was adjusted for variables in model 7 plus cognitive function (MMSE) at baseline

Ref, Reference; PASE, Physical Activity Scale of the Elderly; DQI, Diet Quality Index; BMI, Body Mass Index; SF-12 MCS, Short Form-12 Mental Component Summary; MMSE, Mini-Mental Status Examination

**Table S1c Educational level at baseline and the risk of incident frailty at 14-year follow-up, women (n=348)**

|                                                                                       | Model 1          | Model 2          | Model 3          | Model 4          | Model 5           | Model 6           | Model 7           | Model 8           |
|---------------------------------------------------------------------------------------|------------------|------------------|------------------|------------------|-------------------|-------------------|-------------------|-------------------|
| Variables                                                                             | OR (95% CI)      | OR (95% CI)      | OR (95% CI)      | OR (95% CI)      | OR (95% CI)       | OR (95% CI)       | OR (95% CI)       | OR (95% CI)       |
| <i>Socio-demographics</i>                                                             |                  |                  |                  |                  |                   |                   |                   |                   |
| Educational level (ref=At least completed primary)                                    |                  |                  |                  |                  |                   |                   |                   |                   |
| Some primary                                                                          | 1.08 (0.66-1.79) | 1.07 (0.65-1.77) | 1.02 (0.55-1.91) | 0.97 (0.52-1.82) | 1.01 (0.53-1.91)  | 0.95 (0.50-1.83)  | 0.95 (0.50-1.83)  | 1.00 (0.52-1.94)  |
| No education                                                                          | 1.20 (0.69-2.08) | 1.15 (0.66-2.02) | 0.96 (0.48-1.92) | 0.95 (0.47-1.91) | 1.15 (0.56-2.37)  | 1.03 (0.49-2.15)  | 1.02 (0.49-2.15)  | 1.26 (0.55-2.89)  |
| Age                                                                                   | 1.21 (1.13-1.29) | 1.20 (1.13-1.28) | 1.25 (1.16-1.36) | 1.26 (1.16-1.36) | 1.25 (1.15-1.35)  | 1.24 (1.14-1.35)  | 1.24 (1.14-1.35)  | 1.25 (1.14-1.36)  |
| Non-married (single, divorced, separated) (ref=Married)                               |                  | 1.19 (0.75-1.90) | 0.99 (0.56-1.75) | 1.01 (0.57-1.79) | 0.96 (0.54-1.71)  | 0.98 (0.55-1.75)  | 0.98 (0.55-1.75)  | 0.97 (0.54-1.74)  |
| Maximum life-time income (ref=Quartile 3 and 4 (HKD\$8,000-13,999 and ≥HKD\$14,000^)) |                  |                  |                  |                  |                   |                   |                   |                   |
| Quartile 2 HKD\$2,500-7900                                                            |                  |                  | 1.73 (0.84-3.58) | 1.64 (0.79-3.41) | 1.90 (0.90-3.99)  | 1.89 (0.88-4.06)  | 1.91 (0.89-4.13)  | 1.98 (0.91-4.29)  |
| Quartile 1 HKD\$0-2,499                                                               |                  |                  | 1.50 (0.75-3.00) | 1.46 (0.73-2.92) | 1.56 (0.77-3.15)  | 1.57 (0.76-3.25)  | 1.57 (0.76-3.25)  | 1.58 (0.77-3.28)  |
| <i>Socioeconomic status</i>                                                           |                  |                  |                  |                  |                   |                   |                   |                   |
| Subjective social status (ref=High)                                                   |                  |                  |                  |                  |                   |                   |                   |                   |
| Low to middle*                                                                        |                  |                  |                  | 1.45 (0.84-2.51) | 1.56 (0.89-2.72)  | 1.60 (0.91-2.82)  | 1.61 (0.91-2.83)  | 1.61 (0.91-2.84)  |
| <i>Medical history</i>                                                                |                  |                  |                  |                  |                   |                   |                   |                   |
| Hypertension (ref=No hypertension)                                                    |                  |                  |                  |                  | 2.08 (1.19-3.65)  | 2.00 (1.12-3.58)  | 1.99 (1.11-3.57)  | 2.03 (1.13-3.64)  |
| Diabetes (ref=No diabetes)                                                            |                  |                  |                  |                  | 1.60 (0.73-3.48)  | 1.50 (0.68-3.30)  | 1.49 (0.67-3.27)  | 1.45 (0.66-3.21)  |
| Stroke (ref=No stroke)                                                                |                  |                  |                  |                  | 5.70 (0.81-40.04) | 6.67 (0.93-47.74) | 6.44 (0.89-46.55) | 6.72 (0.93-48.44) |
| <i>Lifestyle</i>                                                                      |                  |                  |                  |                  |                   |                   |                   |                   |
| Current smoker (ref=Non-current)                                                      |                  |                  |                  |                  |                   | 0.62 (0.05-8.10)  | 0.62 (0.05-8.07)  | 0.52 (0.04-6.64)  |

---

|                                           |                  |                  |                  |
|-------------------------------------------|------------------|------------------|------------------|
| smoker)                                   |                  |                  |                  |
| Current drinker (ref=Non-current drinker) | 1.22 (0.70-2.15) | 1.21 (0.69-2.13) | 1.24 (0.70-2.19) |
| Physical activity, PASE score             | 1.00 (0.99-1.01) | 1.00 (0.99-1.01) | 1.00 (0.99-1.01) |
| Diet quality, DQI                         | 0.99 (0.97-1.02) | 0.99 (0.97-1.02) | 0.99 (0.96-1.02) |
| BMI, kg/m <sup>2</sup>                    | 1.08 (0.98-1.19) | 1.08 (0.98-1.18) | 1.08 (0.98-1.19) |
| <u>Mental health</u>                      |                  |                  |                  |
| SF-12 MCS score                           |                  | 1.01 (0.97-1.05) | 1.01 (0.97-1.06) |
| <u>Cognitive function</u>                 |                  |                  |                  |
| MMSE score                                |                  |                  | 1.06 (0.96-1.16) |

---

^ Maximum life-time income of quartile 3 and 4 (HKD\$8,000-13,999 and ≥HKD\$14,000) were combined due to small sample sizes

\* Subjective social status of low and middle groups were combined due to small sample sizes

Model 1 was adjusted for age at baseline

Model 2 was adjusted for variable in model 1 plus marital status at baseline

Model 3 was adjusted for variables in model 2 plus maximum life-time income at baseline

Model 4 was adjusted for variables in model 3 plus subjective social status (community status ladder) at baseline

Model 5 was adjusted for variables in model 4 plus medical history (hypertension, diabetes, and stroke) at baseline

Model 6 was adjusted for variables in model 5 plus lifestyle (smoking status, alcohol consumption, physical activity (PASE score), diet quality (DQI), BMI) at baseline

Model 7 was adjusted for variables in model 6 plus mental health (SF-12 MCS) at baseline

Model 8 was adjusted for variables in model 7 plus cognitive function (MMSE) at baseline

Ref, Reference; PASE, Physical Activity Scale of the Elderly; DQI, Diet Quality Index; BMI, Body Mass Index; SF-12 MCS, Short Form-12 Mental Component Summary; MMSE, Mini-Mental Status Examination

**Table S2a Maximum life-time income and the risk of incident frailty at 14-year follow-up, both sexes (n=566)**

|                                                         | Model 1          | Model 2          | Model 3          | Model 4          | Model 5           | Model 6           | Model 7           | Model 8           |
|---------------------------------------------------------|------------------|------------------|------------------|------------------|-------------------|-------------------|-------------------|-------------------|
| Variables                                               | OR (95% CI)      | OR (95% CI)      | OR (95% CI)      | OR (95% CI)      | OR (95% CI)       | OR (95% CI)       | OR (95% CI)       | OR (95% CI)       |
| <i>Socio-demographics</i>                               |                  |                  |                  |                  |                   |                   |                   |                   |
| Maximum life-time income (ref=                          |                  |                  |                  |                  |                   |                   |                   |                   |
| Quartile 4 ≥HKD\$14,000)                                |                  |                  |                  |                  |                   |                   |                   |                   |
| Quartile 3 HKD\$8,000-13,999                            | 0.92 (0.57-1.49) | 0.92 (0.57-1.49) | 0.89 (0.55-1.45) | 0.82 (0.50-1.34) | 0.82 (0.50-1.35)  | 0.83 (0.50-1.37)  | 0.82 (0.50-1.36)  | 0.82 (0.50-1.36)  |
| Quartile 2 HKD\$2,500-7900                              | 1.35 (0.79-2.31) | 1.36 (0.79-2.32) | 1.29 (0.75-2.24) | 1.17 (0.67-2.04) | 1.25 (0.71-2.19)  | 1.30 (0.74-2.30)  | 1.32 (0.75-2.33)  | 1.33 (0.75-2.35)  |
| Quartile 1 HKD\$0-2,499                                 | 1.31 (0.73-2.34) | 1.31 (0.73-2.34) | 1.22 (0.67-2.23) | 1.12 (0.61-2.05) | 1.15 (0.62-2.12)  | 1.19 (0.64-2.20)  | 1.18 (0.64-2.19)  | 1.19 (0.64-2.21)  |
| Age                                                     | 1.21 (1.15-1.28) | 1.22 (1.15-1.28) | 1.21 (1.15-1.28) | 1.22 (1.15-1.29) | 1.22 (1.15-1.29)  | 1.22 (1.15-1.29)  | 1.22 (1.15-1.29)  | 1.22 (1.15-1.29)  |
| Female (ref=Male)                                       | 1.81 (1.18-2.76) | 1.82 (1.17-2.84) | 1.77 (1.13-2.78) | 2.04 (1.29-3.24) | 2.01 (1.25-3.21)  | 2.15 (1.29-3.57)  | 2.16 (1.30-3.60)  | 2.17 (1.30-3.62)  |
| Non-married (single, divorced, separated) (ref=Married) |                  | 0.96 (0.60-1.56) | 0.93 (0.57-1.53) | 0.95 (0.58-1.56) | 0.88 (0.53-1.46)  | 0.89 (0.54-1.48)  | 0.90 (0.54-1.50)  | 0.90 (0.54-1.50)  |
| Educational level (ref=At least completed primary)      |                  |                  |                  |                  |                   |                   |                   |                   |
| Some primary                                            |                  |                  | 1.17 (0.77-1.77) | 1.08 (0.71-1.64) | 1.06 (0.69-1.61)  | 1.02 (0.66-1.56)  | 1.00 (0.65-1.54)  | 1.01 (0.65-1.56)  |
| No education                                            |                  |                  | 1.27 (0.71-2.27) | 1.25 (0.70-2.25) | 1.48 (0.81-2.71)  | 1.31 (0.71-2.43)  | 1.30 (0.70-2.41)  | 1.34 (0.68-2.62)  |
| <i>Socioeconomic status</i>                             |                  |                  |                  |                  |                   |                   |                   |                   |
| Subjective social status (ref=High)                     |                  |                  |                  |                  |                   |                   |                   |                   |
| Middle                                                  |                  |                  |                  | 1.83 (1.24-2.68) | 1.97 (1.33-2.92)  | 2.03 (1.36-3.02)  | 2.03 (1.36-3.01)  | 2.03 (1.36-3.02)  |
| Low                                                     |                  |                  |                  | 2.43 (1.26-4.68) | 2.29 (1.17-4.47)  | 2.30 (1.17-4.49)  | 2.35 (1.20-4.61)  | 2.34 (1.19-4.60)  |
| <i>Medical history</i>                                  |                  |                  |                  |                  |                   |                   |                   |                   |
| Hypertension (ref=No hypertension)                      |                  |                  |                  |                  | 1.93 (1.31-2.84)  | 1.83 (1.23-2.72)  | 1.83 (1.23-2.73)  | 1.84 (1.23-2.74)  |
| Diabetes (ref=No diabetes)                              |                  |                  |                  |                  | 1.86 (1.10-3.14)  | 1.78 (1.05-3.03)  | 1.78 (1.05-3.03)  | 1.78 (1.05-3.03)  |
| Stroke (ref=No stroke)                                  |                  |                  |                  |                  | 3.57 (1.27-10.05) | 3.79 (1.32-10.84) | 3.74 (1.31-10.68) | 3.75 (1.31-10.69) |
| <i>Lifestyle</i>                                        |                  |                  |                  |                  |                   |                   |                   |                   |

|                                           |                  |                  |                  |
|-------------------------------------------|------------------|------------------|------------------|
| Current smoker (ref=Non-current smoker)   | 1.19 (0.47-3.03) | 1.18 (0.47-3.01) | 1.18 (0.46-3.01) |
| Current drinker (ref=Non-current drinker) | 1.11 (0.74-1.64) | 1.10 (0.74-1.64) | 1.10 (0.74-1.64) |
| Physical activity, PASE score             | 1.00 (1.00-1.00) | 1.00 (1.00-1.00) | 1.00 (1.00-1.00) |
| Diet quality, DQI                         | 1.00 (0.98-1.01) | 0.99 (0.98-1.01) | 0.99 (0.98-1.01) |
| BMI, kg/m <sup>2</sup>                    | 1.07 (1.01-1.15) | 1.07 (1.00-1.15) | 1.07 (1.00-1.15) |
| <u>Mental health</u>                      |                  |                  |                  |
| SF-12 MCS score                           |                  | 1.01 (0.98-1.05) | 1.01 (0.98-1.05) |
| <u>Cognitive function</u>                 |                  |                  |                  |
| MMSE score                                |                  |                  | 1.01 (0.94-1.08) |

Model 1 was adjusted for age and sex at baseline

Model 2 was adjusted for variables in model 1 plus marital status at baseline

Model 3 was adjusted for variables in model 2 plus educational level at baseline

Model 4 was adjusted for variables in model 3 plus subjective social status (community status ladder) at baseline

Model 5 was adjusted for variables in model 4 plus medical history (hypertension, diabetes, and stroke) at baseline

Model 6 was adjusted for variables in model 5 plus lifestyle (smoking status, alcohol consumption, physical activity (PASE score), diet quality (DQI), BMI) at baseline

Model 7 was adjusted for variables in model 6 plus mental health (SF-12 MCS) at baseline

Model 8 was adjusted for variables in model 7 plus cognitive function (MMSE) at baseline

Ref, Reference; PASE, Physical Activity Scale of the Elderly; DQI, Diet Quality Index; BMI, Body Mass Index; SF-12 MCS, Short Form-12 Mental Component Summary; MMSE, Mini-Mental Status Examination



**Table S2b Maximum life-time income and the risk of incident frailty at 14-year follow-up, men (n=310)**

|                                                         | Model 1          | Model 2          | Model 3          | Model 4          | Model 5           | Model 6           | Model 7           | Model 8           |
|---------------------------------------------------------|------------------|------------------|------------------|------------------|-------------------|-------------------|-------------------|-------------------|
| Variables                                               | OR (95% CI)      | OR (95% CI)      | OR (95% CI)      | OR (95% CI)      | OR (95% CI)       | OR (95% CI)       | OR (95% CI)       | OR (95% CI)       |
| <i>Socio-demographics</i>                               |                  |                  |                  |                  |                   |                   |                   |                   |
| Maximum life-time income (ref=                          |                  |                  |                  |                  |                   |                   |                   |                   |
| Quartile 4 ≥HKD\$14,000)                                |                  |                  |                  |                  |                   |                   |                   |                   |
| Quartile 3 HKD\$8,000-13,999                            | 1.36 (0.78-2.36) | 1.37 (0.79-2.37) | 1.31 (0.75-2.30) | 1.21 (0.69-2.14) | 1.21 (0.68-2.16)  | 1.23 (0.69-2.20)  | 1.22 (0.68-2.19)  | 1.24 (0.69-2.22)  |
| Quartile 2 HKD\$2,500-7900                              | 1.39 (0.69-2.80) | 1.42 (0.70-2.87) | 1.41 (0.69-2.87) | 1.37 (0.66-2.84) | 1.39 (0.66-2.92)  | 1.45 (0.68-3.08)  | 1.47 (0.69-3.11)  | 1.37 (0.64-2.93)  |
| Quartile 1 HKD\$0-2,499                                 | 1.72 (0.62-4.76) | 1.72 (0.62-4.77) | 1.72 (0.62-4.80) | 1.43 (0.51-4.05) | 1.50 (0.52-4.30)  | 1.43 (0.50-4.15)  | 1.48 (0.51-4.29)  | 1.35 (0.46-3.97)  |
| Age                                                     | 1.17 (1.08-1.26) | 1.17 (1.09-1.26) | 1.17 (1.09-1.26) | 1.18 (1.09-1.28) | 1.19 (1.10-1.29)  | 1.20 (1.11-1.30)  | 1.20 (1.11-1.30)  | 1.20 (1.11-1.30)  |
| Non-married (single, divorced, separated) (ref=Married) |                  | 0.75 (0.27-2.07) | 0.71 (0.25-2.01) | 0.70 (0.24-2.01) | 0.58 (0.20-1.70)  | 0.60 (0.20-1.77)  | 0.61 (0.21-1.81)  | 0.62 (0.21-1.86)  |
| Educational level (ref=At least completed primary)      |                  |                  |                  |                  |                   |                   |                   |                   |
| Some primary                                            |                  |                  | 1.16 (0.66-2.03) | 1.01 (0.57-1.79) | 0.95 (0.53-1.71)  | 0.93 (0.51-1.68)  | 0.89 (0.49-1.62)  | 0.81 (0.44-1.51)  |
| No education                                            |                  |                  | 2.25 (0.62-8.25) | 2.11 (0.54-8.16) | 3.05 (0.75-12.43) | 2.80 (0.66-11.93) | 2.89 (0.68-12.36) | 2.30 (0.52-10.09) |
| Subjective social status (ref=High)                     |                  |                  |                  |                  |                   |                   |                   |                   |
| Middle                                                  |                  |                  |                  | 2.06 (1.22-3.49) | 2.21 (1.29-3.78)  | 2.23 (1.30-3.83)  | 2.22 (1.29-3.82)  | 2.21 (1.28-3.81)  |
| Low                                                     |                  |                  |                  | 3.75 (1.66-8.47) | 3.44 (1.48-7.97)  | 3.42 (1.47-7.97)  | 3.45 (1.48-8.07)  | 3.60 (1.54-8.41)  |
| <i>Medical history</i>                                  |                  |                  |                  |                  |                   |                   |                   |                   |
| Hypertension (ref=No hypertension)                      |                  |                  |                  |                  | 1.93 (1.12-3.33)  | 1.80 (1.02-3.18)  | 1.82 (1.03-3.21)  | 1.74 (0.98-3.09)  |
| Diabetes (ref=No diabetes)                              |                  |                  |                  |                  | 2.02 (0.97-4.24)  | 1.95 (0.93-4.12)  | 2.01 (0.95-4.27)  | 1.99 (0.93-4.23)  |
| Stroke (ref=No stroke)                                  |                  |                  |                  |                  | 3.07 (0.86-10.99) | 3.12 (0.86-11.40) | 3.15 (0.87-11.48) | 3.28 (0.90-12.00) |
| <i>Lifestyle</i>                                        |                  |                  |                  |                  |                   |                   |                   |                   |
| Current smoker (ref=No current smoker)                  |                  |                  |                  |                  |                   | 1.18 (0.42-3.30)  | 1.15 (0.41-3.24)  | 1.13 (0.40-3.19)  |
| Current drinker (ref=No current drinker)                |                  |                  |                  |                  |                   | 1.00 (0.56-1.79)  | 1.02 (0.57-1.83)  | 1.03 (0.57-1.86)  |

---

|                               |                  |                  |                  |
|-------------------------------|------------------|------------------|------------------|
| drinker)                      |                  |                  |                  |
| Physical activity, PASE score | 1.00 (1.00-1.01) | 1.00 (1.00-1.01) | 1.00 (1.00-1.01) |
| Diet quality, DQI             | 1.00 (0.97-1.03) | 1.00 (0.97-1.02) | 1.00 (0.97-1.02) |
| BMI, kg/m <sup>2</sup>        | 1.07 (0.97-1.18) | 1.07 (0.97-1.18) | 1.07 (0.97-1.18) |
| <u>Mental health</u>          |                  |                  |                  |
| SF-12 MCS score               |                  | 1.02 (0.97-1.07) | 1.02 (0.98-1.07) |
| <u>Cognitive function</u>     |                  |                  |                  |
| MMSE score                    |                  |                  | 0.92 (0.81-1.05) |

---

Model 1 was adjusted for age at baseline

Model 2 was adjusted for variable in model 1 plus marital status at baseline

Model 3 was adjusted for variables in model 2 plus educational level at baseline

Model 4 was adjusted for variables in model 3 plus subjective social status (community status ladder) at baseline

Model 5 was adjusted for variables in model 4 plus medical history (hypertension, diabetes, and stroke) at baseline

Model 6 was adjusted for variables in model 5 plus lifestyle (smoking status, alcohol consumption, physical activity (PASE score), diet quality (DQI), BMI) at baseline

Model 7 was adjusted for variables in model 6 plus mental health (SF-12 MCS) at baseline

Model 8 was adjusted for variables in model 7 plus cognitive function (MMSE) at baseline

Ref, Reference; PASE, Physical Activity Scale of the Elderly; DQI, Diet Quality Index; BMI, Body Mass Index; SF-12 MCS, Short Form-12 Mental Component Summary; MMSE, Mini-Mental Status Examination

**Table S2c Maximum life-time income and the risk of incident frailty at 14-year follow-up, women (n=256)**

|                                     | Model 1          | Model 2          | Model 3          | Model 4          | Model 5           | Model 6           | Model 7           | Model 8           |
|-------------------------------------|------------------|------------------|------------------|------------------|-------------------|-------------------|-------------------|-------------------|
| Variables                           | OR (95% CI)      | OR (95% CI)      | OR (95% CI)      | OR (95% CI)      | OR (95% CI)       | OR (95% CI)       | OR (95% CI)       | OR (95% CI)       |
| <i>Socio-demographics</i>           |                  |                  |                  |                  |                   |                   |                   |                   |
| Maximum life-time income (ref=      |                  |                  |                  |                  |                   |                   |                   |                   |
| Quartile 3 and 4                    |                  |                  |                  |                  |                   |                   |                   |                   |
| (HKD\$8,000-13,999 and              |                  |                  |                  |                  |                   |                   |                   |                   |
| ≥HKD\$14,000^))                     |                  |                  |                  |                  |                   |                   |                   |                   |
| Quartile 2 HKD\$2,500-7900          | 1.72 (0.86-3.45) | 1.73 (0.86-3.49) | 1.73 (0.84-3.58) | 1.64 (0.79-3.41) | 1.90 (0.90-3.99)  | 1.89 (0.88-4.06)  | 1.91 (0.89-4.13)  | 1.98 (0.91-4.29)  |
| Quartile 1 HKD\$0-2,499             | 1.49 (0.78-2.87) | 1.49 (0.78-2.87) | 1.50 (0.75-3.00) | 1.46 (0.73-2.92) | 1.56 (0.77-3.15)  | 1.57 (0.76-3.25)  | 1.57 (0.76-3.25)  | 1.58 (0.77-3.28)  |
| Age                                 | 1.25 (1.16-1.35) | 1.25 (1.16-1.36) | 1.25 (1.16-1.36) | 1.26 (1.16-1.36) | 1.25 (1.15-1.35)  | 1.24 (1.14-1.35)  | 1.24 (1.14-1.35)  | 1.25 (1.14-1.36)  |
| Non-married (single, divorced,      |                  | 0.98 (0.56-1.71) | 0.99 (0.56-1.75) | 1.01 (0.57-1.79) | 0.96 (0.54-1.71)  | 0.98 (0.55-1.75)  | 0.98 (0.55-1.75)  | 0.97 (0.54-1.74)  |
| separated) (ref=Married)            |                  |                  |                  |                  |                   |                   |                   |                   |
| Educational level (ref=At least     |                  |                  |                  |                  |                   |                   |                   |                   |
| completed primary)                  |                  |                  |                  |                  |                   |                   |                   |                   |
| Some primary                        |                  |                  | 1.02 (0.55-1.91) | 0.97 (0.52-1.82) | 1.01 (0.53-1.91)  | 0.95 (0.50-1.83)  | 0.95 (0.50-1.83)  | 1.00 (0.52-1.94)  |
| No education                        |                  |                  | 0.96 (0.48-1.92) | 0.95 (0.47-1.91) | 1.15 (0.56-2.37)  | 1.03 (0.49-2.15)  | 1.02 (0.49-2.15)  | 1.26 (0.55-2.89)  |
| <i>Socioeconomic status</i>         |                  |                  |                  |                  |                   |                   |                   |                   |
| Subjective social status (ref=High) |                  |                  |                  |                  |                   |                   |                   |                   |
| Low to middle*                      |                  |                  |                  | 1.45 (0.84-2.51) | 1.56 (0.89-2.72)  | 1.60 (0.91-2.82)  | 1.61 (0.91-2.83)  | 1.61 (0.91-2.84)  |
| <i>Medical history</i>              |                  |                  |                  |                  |                   |                   |                   |                   |
| Hypertension (ref=No                |                  |                  |                  |                  | 2.08 (1.19-3.65)  | 2.00 (1.12-3.58)  | 1.99 (1.11-3.57)  | 2.03 (1.13-3.64)  |
| hypertension)                       |                  |                  |                  |                  |                   |                   |                   |                   |
| Diabetes (ref=No diabetes)          |                  |                  |                  |                  | 1.60 (0.73-3.48)  | 1.50 (0.68-3.30)  | 1.49 (0.67-3.27)  | 1.45 (0.66-3.21)  |
| Stroke (ref=No stroke)              |                  |                  |                  |                  | 5.70 (0.81-40.04) | 6.67 (0.93-47.74) | 6.44 (0.89-46.55) | 6.72 (0.93-48.44) |
| <i>Lifestyle</i>                    |                  |                  |                  |                  |                   |                   |                   |                   |
| Current smoker (ref=Non-current     |                  |                  |                  |                  |                   | 0.62 (0.05-8.10)  | 0.62 (0.05-8.07)  | 0.52 (0.04-6.64)  |

---

|                                            |                  |                  |                  |
|--------------------------------------------|------------------|------------------|------------------|
| smoker)                                    |                  |                  |                  |
| Current drinker (ref=Non –current drinker) | 1.22 (0.70-2.15) | 1.21 (0.69-2.13) | 1.24 (0.70-2.19) |
| Physical activity, PASE score              | 1.00 (0.99-1.01) | 1.00 (0.99-1.01) | 1.00 (0.99-1.01) |
| Diet quality, DQI                          | 0.99 (0.97-1.02) | 0.99 (0.97-1.02) | 0.99 (0.96-1.02) |
| BMI, kg/m <sup>2</sup>                     | 1.08 (0.98-1.19) | 1.08 (0.98-1.18) | 1.08 (0.98-1.19) |
| <u>Mental health</u>                       |                  |                  |                  |
| SF-12 MCS score                            |                  | 1.01 (0.97-1.05) | 1.01 (0.97-1.06) |
| <u>Cognitive function</u>                  |                  |                  |                  |
| MMSE score                                 |                  |                  | 1.06 (0.96-1.16) |

---

^ Maximum life-time income of quartile 3 and 4 (HKD\$8,000-13,999 and ≥HKD\$14,000) were combined due to small sample sizes

\* Subjective social status of low and middle groups were combined due to small sample sizes

Model 1 was adjusted for age at baseline

Model 2 was adjusted for variable in model 1 plus marital status at baseline

Model 3 was adjusted for variables in model 2 plus educational level at baseline

Model 4 was adjusted for variables in model 3 plus subjective social status (community status ladder) at baseline

Model 5 was adjusted for variables in model 4 plus medical history (hypertension, diabetes, and stroke) at baseline

Model 6 was adjusted for variables in model 5 plus lifestyle (smoking status, alcohol consumption, physical activity (PASE score), diet quality (DQI), BMI) at baseline

Model 7 was adjusted for variables in model 6 plus mental health (SF-12 MCS) at baseline

Model 8 was adjusted for variables in model 7 plus cognitive function (MMSE) at baseline

Ref, Reference; PASE, Physical Activity Scale of the Elderly; DQI, Diet Quality Index; BMI, Body Mass Index; SF-12 MCS, Short Form-12 Mental Component Summary; MMSE, Mini-Mental Status Examination

**Table S3 Baseline characteristics of the study population retained in the 14-year follow-up versus those loss to follow-up (n=4000)**

|                                           | Loss to follow-up (n=2939) | Retained in the study (n=1061) | P      |
|-------------------------------------------|----------------------------|--------------------------------|--------|
|                                           | Mean ± SD / n (%)          | Mean ± SD / n (%)              |        |
| <u>Demographics</u>                       |                            |                                |        |
| Age, years                                | 73.4±5.3                   | 70.0±3.8                       | <0.001 |
| Sex                                       |                            |                                |        |
| Men                                       | 1491 (50.7)                | 509 (48.0)                     | 0.124  |
| Women                                     | 1448 (49.3)                | 552 (52.0)                     |        |
| Marital status                            |                            |                                |        |
| Married                                   | 2005 (68.2)                | 822 (77.5)                     | <0.001 |
| Non-married (single, divorced, separated) | 933 (31.8)                 | 239 (22.5)                     |        |
| <u>Objective socioeconomic status</u>     |                            |                                |        |
| Educational level                         |                            |                                |        |
| At least completed primary                | 1257 (42.8)                | 563 (53.1)                     | <0.001 |
| Some primary                              | 1004 (34.2)                | 320 (30.2)                     |        |
| No education                              | 678 (23.1)                 | 178 (16.8)                     |        |
| Maximum life-time income                  |                            |                                |        |
| Quartile 4 ≥HKD\$14,000                   | 390 (18.9)                 | 220 (26.0)                     | <0.001 |
| Quartile 3 HKD\$8,000-13,999              | 380 (18.4)                 | 203 (24.0)                     |        |
| Quartile 2 HKD\$2,500-7900                | 641 (31.0)                 | 208 (24.6)                     |        |
| Quartile 1 HKD\$0-2,499                   | 657 (31.8)                 | 214 (25.3)                     |        |
| <u>Medical history</u>                    |                            |                                |        |
| Hypertension                              |                            |                                |        |
| No                                        | 1643 (55.9)                | 650 (61.3)                     | 0.002  |
| Yes                                       | 1296 (44.1)                | 411 (38.7)                     |        |
| Diabetes                                  |                            |                                |        |
| No                                        | 2484 (84.5)                | 937 (88.3)                     | 0.003  |
| Yes                                       | 455 (15.5)                 | 124 (11.7)                     |        |
| Stroke                                    |                            |                                |        |
| No                                        | 2803 (95.4)                | 1022 (96.3)                    | 0.194  |
| Yes                                       | 136 (4.6)                  | 39 (3.7)                       |        |
| <u>Lifestyle</u>                          |                            |                                |        |
| Current smoker                            |                            |                                |        |
| No                                        | 2711 (92.2)                | 1014 (95.6)                    | <0.001 |

|                                 |             |            |        |
|---------------------------------|-------------|------------|--------|
| Yes                             | 228 (7.8)   | 47 (4.4)   |        |
| Current drinker                 |             |            |        |
| No                              | 1415 (48.1) | 477 (45.0) | 0.075  |
| Yes                             | 1524 (51.9) | 584 (55.0) |        |
| Physical activity, PASE score   | 87.9±41.4   | 100.8±45.9 | <0.001 |
| Diet quality, DQI               | 63.9±9.7    | 65.6±9.1   | <0.001 |
| BMI, kg/m <sup>2</sup>          | 23.6±3.4    | 23.8±3.0   | 0.117  |
| <u>Mental health</u>            |             |            |        |
| SF-12 MCS score                 | 55.2±7.50   | 56.11±6.65 | <0.001 |
| <u>Cognitive function</u>       |             |            |        |
| MMSE score                      | 25.2±3.82   | 26.7±3.03  | <0.001 |
| <u>Subjective social status</u> |             |            |        |
| High                            | 1486 (53.1) | 609 (58.8) | <0.001 |
| Middle                          | 1001 (35.8) | 357 (34.5) |        |
| Low                             | 312 (11.1)  | 70 (6.8)   |        |
| <u>Frailty status</u>           |             |            |        |
| Robust                          | 1426 (48.5) | 712 (67.1) | <0.001 |
| Pre-frail                       | 1325 (45.1) | 334 (31.5) |        |
| Frail                           | 188 (6.4)   | 15 (1.4)   |        |

Missing data: Marital status (Loss to follow-up, n=1); Maximum life-time income (Loss to follow-up, n=871; Retained in the study, n=216); Subjective social status (Loss to follow-up, n=140; Retained in the study, n=25)

PASE, Physical Activity Scale of the Elderly; DQI, Diet Quality Index; BMI, Body Mass Index; SF-12 MCS, Short Form-12 Mental Component Summary; MMSE, Mini-Mental Status Examination
